# Supplementary material for: Fatty Acid Profiling as a Tool for Fostering the Traceability of the Halophyte Plant Salicornia ramosissima and Contributing to Its Nutritional Valorization
Source: MDPI journal article supplement (doi:10.3390/plants13040545), 2024-02-16
Supplement: s1 [file s1]

**Table S5.** Raw data of relative abundance (%) of fatty acids (FAs) present in the sh for each FA present in the four locations sampled: Ria de Aveiro (RAv, n = 30); Mo Ria Formosa (RF, n = 27).

| Samples | C14:0  | C16:0   | C16:1  | C17:0  | C18:0   | C18:1 <i>n</i> -9 | C18:2 <i>n</i> -6 |
|---------|--------|---------|--------|--------|---------|-------------------|-------------------|
| RAv1    | 0,2505 | 18,959  | 0,9717 | 0,2541 | 5,54805 | 2,304835          | 25,36313          |
| RAv2    | 0,4374 | 17,5559 | 1,1775 | 0,41   | 6,05942 | 2,905931          | 27,73148          |
| RAv3    | 0,2787 | 17,9457 | 0,8825 | 0,3191 | 4,04728 | 3,108981          | 26,11638          |
| RAv4    | 0,2258 | 18,004  | 1,0268 | 0,2726 | 3,90664 | 2,42496           | 23,36096          |
| RAv5    | 0,2118 | 17,454  | 0,8996 | 0,2119 | 5,43848 | 1,953384          | 21,09708          |
| RAv6    | 0,2887 | 19,647  | 0,7768 | 0,3301 | 10,3151 | 2,728328          | 21,31459          |
| RAv7    | 0,3385 | 17,1059 | 0,9947 | 0,0852 | 6,8278  | 2,750374          | 24,28139          |
| RAv8    | 0,2646 | 18,2208 | 1,0375 | 0,2681 | 4,42226 | 2,46171           | 24,66797          |
| RAv9    | 0,2085 | 17,3198 | 1,2283 | 0,3094 | 3,98769 | 2,421711          | 22,74358          |
| RAv10   | 0,3378 | 21,5837 | 1,2117 | 0,2875 | 6,25216 | 2,675633          | 28,1809           |
| RAv11   | 0,2866 | 16,0399 | 0,8742 | 0,3029 | 4,90054 | 3,005967          | 24,85145          |
| RAv12   | 0,3041 | 19,8409 | 0,9598 | 0,2138 | 14,4714 | 2,226053          | 21,31955          |
| RAv13   | 0,3277 | 18,1588 | 1,1471 | 0,3418 | 6,7926  | 2,856474          | 24,6489           |
| RAv14   | 0,3664 | 21,5272 | 1,024  | 0,2822 | 6,32556 | 1,118283          | 21,87185          |
| RAv15   | 0,2678 | 16,6238 | 0,9603 | 0,2861 | 3,26287 | 2,955637          | 28,97403          |
| RAv16   | 0,3375 | 18,8841 | 1,1415 | 0,3154 | 3,94287 | 2,993473          | 30,85143          |
| RAv17   | 0,156  | 17,8585 | 0,9232 | 0,1739 | 3,9975  | 2,36737           | 25,3523           |
| RAv18   | 0,2182 | 18,169  | 0,9228 | 0,2021 | 2,75635 | 2,062332          | 27,67208          |
| RAv19   | 0,294  | 17,3419 | 0,6591 | 0,259  | 6,11404 | 3,301502          | 20,8176           |
| RAv20   | 0,1683 | 16,6231 | 0,8782 | 0,2402 | 3,41013 | 2,633683          | 26,9415           |
| RAv21   | 0,1853 | 14,6162 | 0,8615 | 0,2    | 3,27477 | 2,758132          | 27,07385          |
| RAv22   | 0,2124 | 18,0472 | 0,9116 | 0,1709 | 3,4223  | 2,765408          | 23,47856          |
| RAv23   | 0,2424 | 19,2497 | 0,9741 | 0,2333 | 3,55179 | 3,078711          | 24,57577          |
| RAv24   | 0,213  | 16,9527 | 0,8688 | 0,2392 | 2,98122 | 2,319496          | 24,13913          |
| RAv25   | 0,1947 | 16,0686 | 0,8475 | 0,2482 | 4,39473 | 3,125956          | 26,6629           |
| RAv26   | 0,215  | 19,1204 | 0,9783 | 0,2285 | 3,68621 | 2,675325          | 25,79908          |
| RAv27   | 0,3241 | 20,6728 | 0,9416 | 0,3219 | 7,33944 | 2,470652          | 24,15631          |
| RAv28   | 0,2286 | 16,9842 | 1,0532 | 0,2352 | 3,33223 | 1,651817          | 21,72264          |
| RAv29   | 0,2042 | 19,1354 | 1,1054 | 0,2482 | 3,59572 | 2,990791          | 28,1578           |
| RAv30   | 0,2433 | 17,1026 | 1,0405 | 0,3095 | 4,7162  | 3,158394          | 27,54908          |
| ME1     | 0,6557 | 19,8021 | 0,562  | 0,2232 | 4,9088  | 3,906136          | 22,45562          |
| ME2     | 0,7455 | 21,8052 | 0,449  | 0,359  | 10,5638 | 3,062691          | 18,60044          |
| ME3     | 1,0484 | 25,4845 | 0,4147 | 0,2499 | 7,01489 | 4,221838          | 17,81308          |
| ME4     | 0,6583 | 21,3714 | 0,6354 | 0,1779 | 4,84676 | 2,854413          | 22,263            |
| ME5     | 0,7033 | 19,695  | 0,4735 | 0,166  | 4,31696 | 3,895569          | 20,655            |
| ME6     | 0,7763 | 20,7952 | 0,5543 | 0,4239 | 10,8936 | 4,653374          | 17,38097          |
| ME7     | 0,4298 | 18,0745 | 0,6956 | 0,1983 | 3,70403 | 2,536678          | 25,43714          |
| ME8     | 0,7062 | 21,4336 | 0,8032 | 0,3252 | 5,96233 | 2,608441          | 23,4647           |
| ME9     | 0,8621 | 20,9934 | 0,5652 | 0,294  | 5,83374 | 3,602919          | 19,99865          |
| ME10    | 0,4837 | 19,9306 | 0,5863 | 0,5828 | 13,9527 | 2,633567          | 19,07432          |
| ME11    | 0,4577 | 19,5185 | 0,6471 | 0,175  | 4,84975 | 3,663611          | 21,93372          |
| ME12    | 0,6805 | 20,4152 | 0,6634 | 0,2391 | 6,43259 | 3,520461          | 21,82715          |
| ME13    | 0,5038 | 18,4659 | 0,4221 | 0,3076 | 5,28472 | 2,52433           | 20,98321          |

|      |        |         |        |        |         |          |          |
|------|--------|---------|--------|--------|---------|----------|----------|
| ME14 | 0,5642 | 18,7399 | 0,493  | 0,2179 | 4,39027 | 3,059498 | 23,95496 |
| ME15 | 0,5472 | 19,0789 | 0,6369 | 0,1666 | 5,37108 | 2,631681 | 24,14692 |
| ME16 | 0,4714 | 20,9689 | 0,652  | 0,3457 | 15,5459 | 1,938726 | 19,38988 |
| ME17 | 0,4992 | 20,5806 | 0,7766 | 0,407  | 7,23592 | 2,406076 | 24,85154 |
| ME18 | 0,3727 | 17,6667 | 0,5758 | 0,2067 | 4,55273 | 6,935221 | 28,2839  |
| ME19 | 0,665  | 22,2846 | 0,5741 | 0,1869 | 5,51295 | 4,81106  | 24,09461 |
| ME20 | 0,4085 | 18,2632 | 0,7916 | 0,2758 | 5,01232 | 4,527927 | 26,49985 |
| ME21 | 0,4551 | 19,9482 | 0,5474 | 0,1663 | 4,89966 | 2,636704 | 23,7875  |
| ME22 | 0,3544 | 18,7221 | 0,7108 | 0,2377 | 4,52532 | 2,254447 | 25,0923  |
| ME23 | 0,4288 | 18,8535 | 0,72   | 0,3655 | 3,95205 | 3,19785  | 23,38807 |
| ME24 | 0,3949 | 18,3176 | 0      | 0,2401 | 4,47477 | 5,426779 | 24,73262 |
| ME25 | 0,4774 | 19,0139 | 0,6107 | 0,2965 | 11,4148 | 2,611066 | 21,84152 |
| ME26 | 0,6688 | 20,2261 | 0,6082 | 0,407  | 6,2007  | 3,952024 | 23,56004 |
| ME27 | 0,8385 | 22,8307 | 0,7464 | 0,5054 | 13,638  | 3,14056  | 19,78568 |
| ME28 | 0,4954 | 19,0053 | 0,753  | 0,2897 | 5,48729 | 2,295291 | 24,86016 |
| ME29 | 0,8723 | 22,18   | 0,5209 | 0,2737 | 5,98671 | 3,874044 | 20,93279 |
| ME30 | 0,6464 | 20,0586 | 0,6676 | 0,3093 | 6,1105  | 2,557364 | 22,39439 |
| TE1  | 0,5068 | 23,5624 | 1,0447 | 0,5668 | 14,0129 | 1,835858 | 16,12853 |
| TE2  | 0,3928 | 18,3599 | 0,8026 | 0,4243 | 6,44218 | 1,350262 | 15,60679 |
| TE3  | 0,3737 | 19,373  | 0,7763 | 0,4563 | 5,48433 | 1,851908 | 17,38899 |
| TE4  | 0,3879 | 20,6896 | 1,2095 | 0,3496 | 5,61504 | 1,71826  | 18,39131 |
| TE5  | 0,3743 | 20,1831 | 1,1549 | 0,2003 | 6,80815 | 1,91631  | 17,56924 |
| TE6  | 0,4085 | 21,6941 | 1,1659 | 0,5629 | 14,8715 | 1,616342 | 17,79849 |
| TE7  | 0,2396 | 19,0245 | 0,9643 | 0,1948 | 7,51205 | 0,832693 | 13,62522 |
| TE8  | 0,3804 | 21,2025 | 0,9838 | 0,372  | 7,18198 | 1,661725 | 16,9821  |
| TE9  | 0,3763 | 20,9528 | 1,1753 | 0,487  | 7,48192 | 1,801221 | 19,76225 |
| TE10 | 0,4127 | 20,989  | 0,9288 | 0,5866 | 12,9884 | 1,845998 | 16,60976 |
| TE11 | 0,3076 | 19,3841 | 0,8169 | 0,3097 | 5,35919 | 1,620446 | 16,01439 |
| TE12 | 0,3103 | 17,4615 | 0,7939 | 0,393  | 6,54945 | 1,348334 | 16,98724 |
| TE13 | 0,2053 | 19,3235 | 1,0074 | 0,1718 | 4,45149 | 1,074482 | 16,22861 |
| TE14 | 0,2574 | 20,8633 | 0,8306 | 0,2468 | 7,55799 | 1,424125 | 15,91589 |
| TE15 | 0,3449 | 22,2305 | 0,9041 | 0,2308 | 10,6237 | 1,163339 | 15,30865 |
| TE16 | 0,3817 | 19,7226 | 1,0999 | 0,3751 | 9,24716 | 1,445461 | 17,07918 |
| TE17 | 0,2987 | 20,8962 | 1,0018 | 0,4717 | 10,4223 | 1,633338 | 16,61516 |
| TE18 | 0,3689 | 21,3383 | 0,9139 | 0,4931 | 14,3902 | 1,693915 | 15,44572 |
| TE19 | 0,3578 | 20,9778 | 0,8977 | 0,4187 | 12,0527 | 1,568394 | 17,76567 |
| TE20 | 0,2644 | 19,0472 | 1,087  | 0,4019 | 4,84676 | 1,76956  | 19,12416 |
| TE21 | 0,2935 | 17,3954 | 0,7809 | 0,4478 | 3,70153 | 2,094415 | 18,7196  |
| TE22 | 0,2496 | 18,3727 | 0,929  | 0,4399 | 3,95619 | 2,230696 | 21,04015 |
| TE23 | 0,3253 | 20,4951 | 0,8401 | 0,2024 | 6,37359 | 1,853362 | 16,77882 |
| TE24 | 0,358  | 19,0243 | 0,9383 | 0,3368 | 9,04097 | 1,366582 | 14,23619 |
| TE25 | 0,4872 | 22,0096 | 0,8433 | 0,671  | 13,3309 | 2,30938  | 18,91081 |
| TE26 | 0,407  | 18,4784 | 0,8221 | 0,4481 | 4,72143 | 2,354302 | 18,35138 |
| TE27 | 0,2913 | 18,1039 | 1,0978 | 0,3347 | 4,29822 | 1,491577 | 17,51778 |
| TE28 | 0,3952 | 21,3353 | 0,8117 | 0,5241 | 15,9336 | 1,189505 | 14,57473 |
| TE29 | 0,3952 | 21,3353 | 0,8117 | 0,5241 | 15,9336 | 1,189505 | 14,57473 |
| TE30 | 0,4239 | 24,0632 | 1,0343 | 0,5525 | 19,2201 | 2,07549  | 15,2744  |
| RF1  | 0,2458 | 21,4474 | 1,1892 | 0,3522 | 15,589  | 0,65471  | 14,07059 |
| RF2  | 0,1801 | 17,9431 | 1,2185 | 0,2363 | 6,46966 | 0,64125  | 18,38077 |
| RF3  | 0,1494 | 18,2217 | 1,5834 | 0,1418 | 5,85077 | 1,352778 | 18,2676  |

|             |        |         |        |        |         |          |          |
|-------------|--------|---------|--------|--------|---------|----------|----------|
| <b>RF4</b>  | 0,1428 | 18,3996 | 1,6412 | 0,1746 | 5,03393 | 0,956293 | 17,50727 |
| <b>RF5</b>  | 0,1906 | 19,0615 | 1,2595 | 0,3487 | 10,4245 | 1,108395 | 16,82764 |
| <b>RF6</b>  | 0,1799 | 19,1423 | 1,337  | 0,199  | 7,584   | 0,795183 | 17,30951 |
| <b>RF7</b>  | 0,1032 | 17,6669 | 1,372  | 0,1482 | 3,9596  | 0,903854 | 18,65078 |
| <b>RF8</b>  | 0,1902 | 19,7699 | 1,5596 | 0,3501 | 16,9555 | 1,677178 | 14,57195 |
| <b>RF9</b>  | 0,1152 | 18,5002 | 1,7362 | 0,1735 | 3,73889 | 0,925173 | 17,60355 |
| <b>RF10</b> | 0,0918 | 17,642  | 1,4886 | 0,134  | 3,40711 | 0,748044 | 18,65808 |
| <b>RF11</b> | 0,1979 | 21,4243 | 1,2707 | 0,3482 | 15,7322 | 0,591021 | 14,95516 |
| <b>RF12</b> | 0,1777 | 20,4732 | 1,4792 | 0,2184 | 8,95598 | 0,652595 | 15,86448 |
| <b>RF13</b> | 0,12   | 18,0024 | 1,4053 | 0,1372 | 5,04599 | 0,657946 | 18,35991 |
| <b>RF14</b> | 0,0905 | 18,6933 | 1,9089 | 0,1542 | 4,77973 | 1,091584 | 16,99858 |
| <b>RF15</b> | 0,1781 | 20,0235 | 1,7003 | 0,1254 | 5,10734 | 1,636923 | 17,38559 |
| <b>RF16</b> | 0,1665 | 19,7911 | 1,8598 | 0,1435 | 4,70728 | 0,870063 | 17,72434 |
| <b>RF17</b> | 0,1369 | 17,7805 | 1,6433 | 0,185  | 5,2443  | 0,728587 | 18,30634 |
| <b>RF18</b> | 0,1479 | 19,2064 | 2,069  | 0,148  | 3,61905 | 0,960206 | 17,00871 |
| <b>RF19</b> | 0,1168 | 17,8732 | 1,6963 | 0,2761 | 3,8249  | 0,749867 | 18,0833  |
| <b>RF20</b> | 0,1723 | 18,7725 | 1,5147 | 0,2873 | 11,1002 | 0,733064 | 15,76176 |
| <b>RF21</b> | 0,1648 | 18,9625 | 1,8068 | 0,1922 | 5,40698 | 0,861105 | 16,59878 |
| <b>RF22</b> | 0,1238 | 17,7806 | 1,8783 | 0,1798 | 3,55144 | 0,797851 | 17,70012 |
| <b>RF23</b> | 0,178  | 19,0828 | 1,5024 | 0,162  | 6,57535 | 0,768235 | 16,44847 |
| <b>RF24</b> | 0,196  | 20,0982 | 1,4138 | 0,3369 | 14,8194 | 1,103136 | 15,01567 |
| <b>RF25</b> | 0,1584 | 19,0834 | 1,7016 | 0,2447 | 4,22137 | 0,855473 | 19,04165 |
| <b>RF26</b> | 0,1516 | 18,9293 | 1,7722 | 0,2186 | 6,46351 | 0,875406 | 17,29107 |
| <b>RF27</b> | 0,2312 | 20,4803 | 1,6487 | 0,2172 | 4,62386 | 0,710329 | 18,32639 |

oots of *Salicornia ramosissima* and their respective variation  
 ndego estuary (ME, n = 30); Tagus estuary (TE, n = 30); and

| C18:3n-3 | C20:0  | C22:0  | EPOXI (9,10-epoxy-octadecanoic acid) | C24:0   |
|----------|--------|--------|--------------------------------------|---------|
| 44,38465 | 0,8451 | 0,6883 | 0                                    | 0,43065 |
| 42,08603 | 0,3166 | 0,6104 | 0                                    | 0,70943 |
| 45,27984 | 0,6104 | 0,7528 | 0                                    | 0,65829 |
| 49,27018 | 0,5908 | 0,0814 | 0                                    | 0,83577 |
| 50,74618 | 0,4424 | 0,6854 | 0                                    | 0,85969 |
| 43,66258 | 0,2192 | 0,0757 | 0                                    | 0,64174 |
| 45,85636 | 0,6129 | 0,6217 | 0                                    | 0,52513 |
| 47,02439 | 0,3902 | 0,282  | 0                                    | 0,96035 |
| 49,81531 | 0,6378 | 0,3301 | 0                                    | 0,99785 |
| 36,93291 | 0,8816 | 0,4959 | 0                                    | 1,16023 |
| 47,35549 | 0,6831 | 0,8583 | 0                                    | 0,84140 |
| 39,71134 | 0,3158 | 0,1728 | 0                                    | 0,46451 |
| 43,07664 | 0,885  | 0,7735 | 0                                    | 0,99147 |
| 45,77725 | 0,3424 | 0,5406 | 0                                    | 0,82429 |
| 44,0505  | 0,6099 | 0,95   | 0                                    | 1,05907 |
| 39,31524 | 0,3698 | 0,4402 | 0                                    | 1,40840 |
| 47,80561 | 0,4842 | 0,2103 | 0                                    | 0,67115 |
| 47,19103 | 0,2473 | 0,2881 | 0                                    | 0,27060 |
| 49,04386 | 0,7873 | 0,7667 | 0                                    | 0,61499 |
| 47,59185 | 0,3471 | 0,2812 | 0                                    | 0,88475 |
| 48,83885 | 0,6346 | 0,7387 | 0                                    | 0,81807 |
| 48,55464 | 0,5988 | 0,7417 | 0                                    | 1,09647 |
| 46,18523 | 0,5592 | 0,5094 | 0                                    | 0,84031 |
| 50,30025 | 0,652  | 0,6765 | 0                                    | 0,65778 |
| 47,21402 | 0,2624 | 0,2059 | 0                                    | 0,77525 |
| 44,99033 | 0,602  | 0,8105 | 0                                    | 0,89447 |
| 42,39963 | 0,2786 | 0,3051 | 0                                    | 0,78990 |
| 53,19038 | 0,4585 | 0,4823 | 0                                    | 0,66098 |
| 42,6847  | 0,4779 | 0,6937 | 0                                    | 0,70622 |
| 43,32212 | 0,6013 | 0,8934 | 0                                    | 1,06355 |
| 39,21032 | 0,7606 | 0,673  | 5,80318                              | 1,03942 |
| 35,7953  | 0,5829 | 0,6442 | 6,30855                              | 1,08347 |
| 37,19955 | 0,5553 | 1,0107 | 3,32258                              | 1,66456 |
| 37,51185 | 0,511  | 0,6436 | 7,37462                              | 1,15176 |
| 36,83443 | 0,43   | 0,5213 | 11,12909                             | 1,17982 |
| 33,91359 | 0,5898 | 0,8824 | 8,15806                              | 0,97853 |
| 44,47739 | 0,7604 | 0,8498 | 1,51332                              | 1,32311 |
| 40,66791 | 0,7419 | 1,3067 | 0,83171                              | 1,14807 |
| 31,97199 | 0,7204 | 1,6479 | 12,15427                             | 1,35542 |
| 37,57815 | 0,5052 | 0,563  | 3,36529                              | 0,74438 |
| 38,02072 | 0,4641 | 0,6821 | 6,12840                              | 3,45929 |
| 36,54886 | 0,7161 | 1,2065 | 6,61845                              | 1,13170 |
| 38,65046 | 0,6826 | 0,8162 | 9,71948                              | 1,63954 |

|          |        |        |         |         |
|----------|--------|--------|---------|---------|
| 39,47194 | 0,7716 | 1,5433 | 5,00091 | 1,79256 |
| 38,26455 | 0,4543 | 0,642  | 6,62546 | 1,43449 |
| 39,92013 | 0,3579 | 0,4095 | 0,00000 | 0,00000 |
| 40,42394 | 0,29   | 0,6814 | 0,94864 | 0,89903 |
| 37,2407  | 0,786  | 1,1382 | 0,68181 | 1,55952 |
| 37,0566  | 0,6052 | 1,3128 | 1,21549 | 1,68065 |
| 40,98866 | 0,8391 | 1,0192 | 0,00000 | 1,37382 |
| 44,02106 | 0,7846 | 1,0328 | 0,53354 | 1,18721 |
| 45,20204 | 0,8154 | 0,9687 | 0,00000 | 1,11692 |
| 46,60067 | 0,4612 | 0,8343 | 0,00000 | 1,19805 |
| 42,01123 | 0,9453 | 1,1985 | 0,81209 | 1,44605 |
| 39,5428  | 0,626  | 0,8857 | 1,31178 | 1,36792 |
| 33,73434 | 0,6136 | 1,6611 | 6,76857 | 1,59953 |
| 34,10463 | 0,6436 | 1,6155 | 0,57435 | 1,57668 |
| 40,76496 | 0,6622 | 1,1596 | 3,17182 | 1,05527 |
| 35,80716 | 0,6325 | 1,3933 | 6,02064 | 1,50591 |
| 40,40321 | 0,7091 | 1,0046 | 4,10639 | 1,03267 |
| 40,21428 | 0,7093 | 0,806  | 0       | 0,61249 |
| 54,68423 | 0,4862 | 0,7572 | 0       | 0,69345 |
| 51,36978 | 0,6623 | 1,2966 | 0       | 0,96687 |
| 49,59394 | 0,654  | 0,7202 | 0       | 0,67063 |
| 48,3766  | 0,6552 | 1,4789 | 0       | 1,28301 |
| 39,79157 | 0,5839 | 0,7319 | 0       | 0,77487 |
| 56,95848 | 0,0915 | 0,138  | 0       | 0,41878 |
| 48,94609 | 0,317  | 0,7246 | 0       | 1,24789 |
| 45,93836 | 0,5046 | 0,8548 | 0       | 0,66548 |
| 44,09638 | 0,4365 | 0,6269 | 0       | 0,47895 |
| 54,56539 | 0,3647 | 0,5762 | 0       | 0,68143 |
| 54,79737 | 0,4409 | 0,5622 | 0       | 0,35578 |
| 56,21535 | 0,153  | 0,4883 | 0       | 0,68074 |
| 51,98823 | 0,1432 | 0,6488 | 0       | 0,12363 |
| 48,09487 | 0,1851 | 0,2839 | 0       | 0,63016 |
| 48,20447 | 0,5832 | 0,9189 | 0       | 0,94230 |
| 46,00858 | 0,8155 | 0,8582 | 0       | 0,97852 |
| 43,60914 | 0,7366 | 0,6161 | 0       | 0,39402 |
| 43,09359 | 1,0077 | 0,9728 | 0       | 0,88715 |
| 52,07664 | 0,3653 | 0,6053 | 0       | 0,41176 |
| 53,87481 | 0,8501 | 0,989  | 0       | 0,85296 |
| 50,60149 | 0,5325 | 0,889  | 0       | 0,75874 |
| 50,32736 | 0,6718 | 0,9921 | 0       | 1,14000 |
| 53,91214 | 0,3422 | 0,1976 | 0       | 0,24682 |
| 39,91404 | 0,2117 | 0,5443 | 0       | 0,76771 |
| 51,53226 | 0,4885 | 1,1189 | 0       | 1,27760 |
| 54,53038 | 0,5812 | 0,8722 | 0       | 0,88101 |
| 44,34642 | 0,185  | 0,4505 | 0       | 0,25395 |
| 44,34642 | 0,185  | 0,4505 | 0       | 0,25395 |
| 35,79266 | 0,5591 | 0,4874 | 0       | 0,51672 |
| 44,31615 | 0,6056 | 0,5573 | 0       | 0,97206 |
| 51,91179 | 0,7219 | 0,7963 | 0       | 1,50030 |
| 51,28261 | 0,705  | 0,8095 | 0       | 1,63538 |

|          |        |        |   |         |
|----------|--------|--------|---|---------|
| 53,18607 | 0,5428 | 0,1162 | 0 | 2,29925 |
| 48,0166  | 0,6051 | 0,8285 | 0 | 1,32891 |
| 50,05194 | 0,34   | 0,9049 | 0 | 2,15630 |
| 54,31166 | 0,5781 | 0,8557 | 0 | 1,44994 |
| 42,08237 | 0,541  | 0,676  | 0 | 1,62619 |
| 54,19809 | 0,6665 | 0,8587 | 0 | 1,48410 |
| 54,61162 | 0,4275 | 0,8853 | 0 | 1,90599 |
| 43,47516 | 0,5382 | 0,5094 | 0 | 0,95773 |
| 50,40256 | 0,586  | 0,5664 | 0 | 0,62356 |
| 53,87475 | 0,5262 | 0,6    | 0 | 1,27035 |
| 54,35046 | 0,4767 | 0,2834 | 0 | 1,17264 |
| 50,36626 | 0,6105 | 0,9555 | 0 | 1,91059 |
| 52,3218  | 0,4678 | 0,7146 | 0 | 1,23320 |
| 52,97471 | 0,5421 | 0,6548 | 0 | 1,80350 |
| 54,35576 | 0,5539 | 0,4909 | 0 | 1,44024 |
| 54,00997 | 0,5985 | 0,7979 | 0 | 1,97315 |
| 48,9212  | 0,5521 | 0,6518 | 0 | 1,53307 |
| 53,8042  | 0,5438 | 0,6165 | 0 | 1,04216 |
| 55,59048 | 0,519  | 0,6002 | 0 | 1,27854 |
| 52,67148 | 0,5304 | 0,7718 | 0 | 1,30903 |
| 44,8523  | 0,5445 | 0,2661 | 0 | 1,35395 |
| 52,21205 | 0,5905 | 0,363  | 0 | 1,52783 |
| 51,51045 | 0,5941 | 0,6772 | 0 | 1,51660 |
| 51,80642 | 0,3065 | 0,3576 | 0 | 1,29151 |
