# Supplementary material for: Fatty Acid Profiling as a Tool for Fostering the Traceability of the Halophyte Plant Salicornia ramosissima and Contributing to Its Nutritional Valorization
Source: MDPI journal article supplement (doi:10.3390/plants13040545), 2024-02-16
Supplement: s1 [file s1]

# Fatty acid profiling as a tool to foster the traceability of the halophyte plant *Salicornia ramosissima* and contribute to its nutritional valorization

Fernando Ricardo <sup>1\*</sup>, Ana Carolina Veríssimo <sup>2,3</sup>, Elisabete Maciel <sup>2</sup>, Maria do Rosário Domingues <sup>2,4\*</sup>, and Ricardo Calado <sup>1</sup>

**Figure S1.** Chromatograms of fatty acids identified in the lipid extract of *Salicornia ramosissima* shoots from a) Ria de Aveiro (RAv); b) Mondego estuary (ME); c) Tagus estuary (TE); and d) Ria Formosa (RF). The peaks in detector response correspond to the acquisition time of each fatty acid.

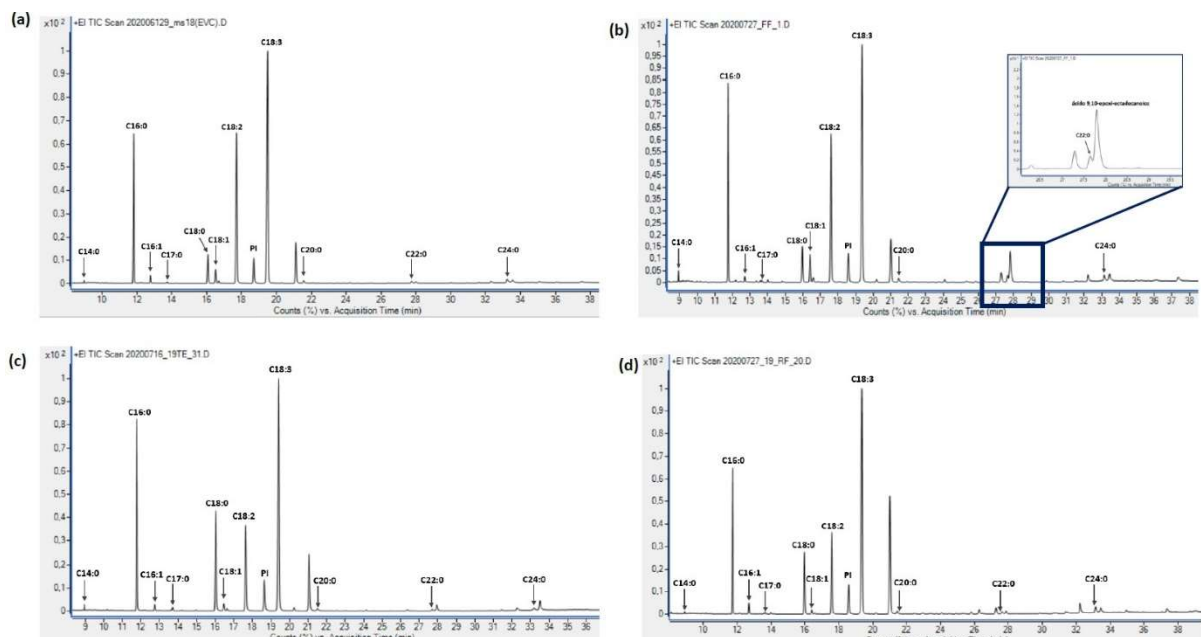

**Figure S2.** a) Representation of the FAME 9,10-epoxy-octadecanoic acid and its fragments  $m/z$  155 and  $m/z$  199; b) GC-EI mass spectra of 9,10-epoxy-octadecanoic acid; c) GC-EI mass spectrum of FAME 9,10 – epoxy-octadecanoic acid.

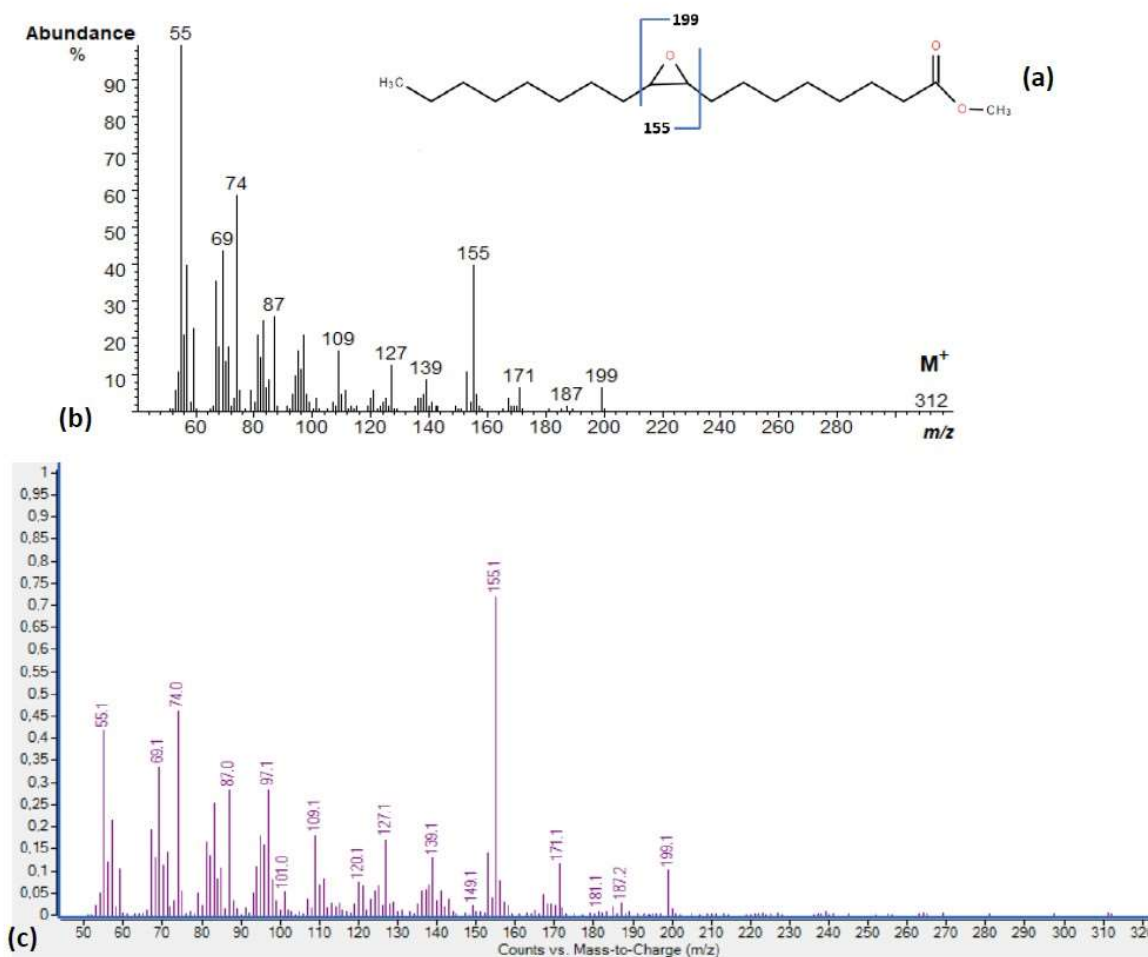

**Figure S3.** Relative abundances of n-3 and n-6 fatty acids identified in *Salicornia ramosissima* shoots from Ria de Aveiro (RAv), Mondego estuary (ME), Tagus estuary (TE), and Ria Formosa (RF). Different letters indicate significant differences between locations (ANOVA,  $p < 0.05$ ).

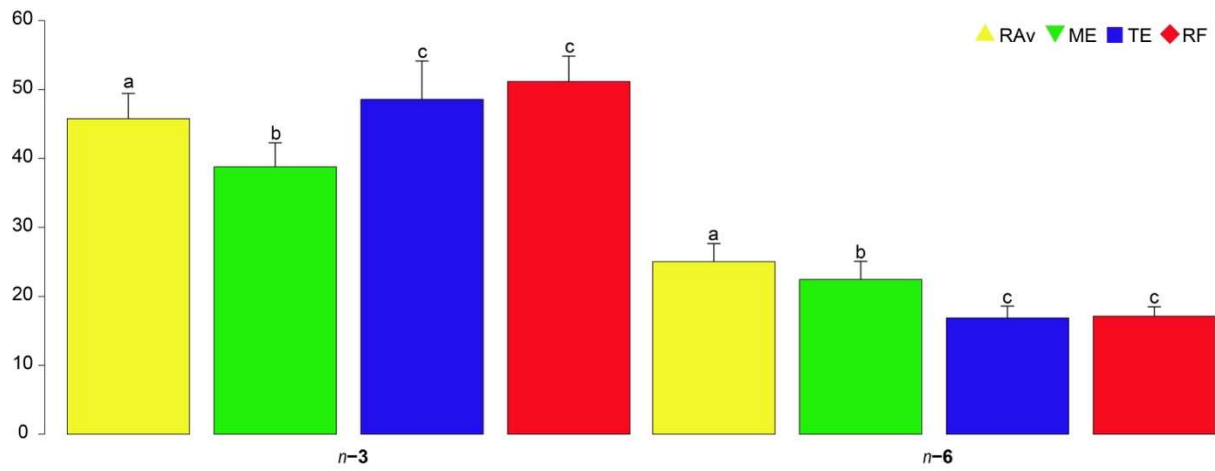

**Table S1.** P-values resulting from post-hoc comparisons (ANOVA) of the fatty acids identified in the shoots of *Salicornia ramosissima* between the four sampling locations: Ria de Aveiro (RAv), Mondego estuary (ME), Tagus estuary (TE), and Ria Formosa (RF). SFAs – saturated fatty acids; MUFAs – monounsaturated fatty acids; PUFAs – polyunsaturated fatty acids; *n*-3 – *n*-3 fatty acids; *n*-6 – *n*-6 fatty acids; AI - atherogenicity index; TI - thrombogenicity index. Values in bold are lower than 0.05.

|                          | RAv vs ME         | RAv vs TE         | RAv vs RF         | ME vs ET          | ME vs RF          | TE vs RF          |
|--------------------------|-------------------|-------------------|-------------------|-------------------|-------------------|-------------------|
| C14:0                    | <b>&lt; 0.001</b> | <b>0.0039</b>     | <b>0.005</b>      | <b>0.002</b>      | <b>&lt; 0.001</b> | <b>&lt; 0.001</b> |
| C16:0                    | <b>&lt; 0.001</b> | <b>&lt; 0.001</b> | 0.215             | 0.692             | <b>0.002</b>      | 0.056             |
| C16:1                    | <b>&lt; 0.001</b> | 0.960             | <b>&lt; 0.001</b> | <b>&lt; 0.001</b> | <b>&lt; 0.001</b> | <b>&lt; 0.001</b> |
| C17:0                    | 0.755             | <b>0.001</b>      | 0.193             | <b>0.017</b>      | <b>0.017</b>      | <b>&lt; 0.001</b> |
| C18:0                    | <b>0.017</b>      | <b>&lt; 0.001</b> | 0.108             | 0.382             | 0.929             | 0.134             |
| C18:1 <i>n</i> -9        | 0.224             | <b>&lt; 0.001</b> | <b>&lt; 0.001</b> | <b>&lt; 0.001</b> | <b>&lt; 0.001</b> | <b>0.015</b>      |
| C18:2 <i>n</i> -6        | 0.600             | <b>&lt; 0.001</b> | <b>&lt; 0.001</b> | <b>&lt; 0.001</b> | <b>&lt; 0.001</b> | 0.990             |
| C18:3 <i>n</i> -3        | <b>0.001</b>      | 0.203             | <b>0.002</b>      | <b>&lt; 0.001</b> | <b>&lt; 0.001</b> | 0.337             |
| C20:0                    | <b>0.023</b>      | 0.911             | 0.999             | <b>0.003</b>      | <b>0.035</b>      | 0.890             |
| C22:0                    | <b>&lt; 0.001</b> | 0.139             | 0.658             | <b>0.008</b>      | <b>&lt; 0.001</b> | 0.784             |
| C24:0                    | <b>&lt; 0.001</b> | 0.850             | <b>&lt; 0.001</b> | <b>&lt; 0.001</b> | 0.880             | <b>&lt; 0.001</b> |
| SFAs                     | <b>&lt; 0.001</b> | <b>&lt; 0.001</b> | <b>0.013</b>      | 0.924             | <b>0.080</b>      | 0.284             |
| MUFAs                    | 0.750             | <b>&lt; 0.001</b> | <b>&lt; 0.001</b> | <b>&lt; 0.001</b> | <b>&lt; 0.001</b> | 0.950             |
| PUFAs                    | <b>&lt; 0.001</b> | <b>&lt; 0.001</b> | 0.234             | 0.345             | <b>0.002</b>      | 0.217             |
| <i>n</i> -3              | <b>0.001</b>      | 0.203             | <b>0.002</b>      | <b>&lt; 0.001</b> | <b>&lt; 0.001</b> | 0.337             |
| <i>n</i> -6              | 0.600             | <b>&lt; 0.001</b> | <b>&lt; 0.001</b> | <b>&lt; 0.001</b> | <b>&lt; 0.001</b> | 0.990             |
| <i>n</i> -3/ <i>n</i> -6 | 0.750             | <b>&lt; 0.001</b> | <b>&lt; 0.001</b> | <b>&lt; 0.001</b> | <b>&lt; 0.001</b> | 0.870             |
| AI                       | <b>&lt; 0.001</b> | <b>&lt; 0.001</b> | 0.248             | 0.487             | <b>&lt; 0.001</b> | <b>0.021</b>      |
| TI                       | <b>&lt; 0.001</b> | <b>0.035</b>      | 0.995             | 0.154             | <b>&lt; 0.001</b> | 0.079             |

**Table S2.** Similarity values (ANOSIM) among the fatty acid profiles of *Salicornia ramosissima* shoots sampled in Ria de Aveiro (RAv), Mondego estuary (ME), Tagus estuary (TE), and Ria Formosa (RF).

|           | R statistic | <i>p</i> |
|-----------|-------------|----------|
| RAv vs ME | 0.697       | 0.001    |
| RAv vs TE | 0.568       | 0.001    |
| RAv vs RF | 0.874       | 0.001    |
| ME vs TE  | 0.763       | 0.001    |
| ME vs RF  | 0.895       | 0.001    |
| TE vs RF  | 0.576       | 0.001    |

**Table S3.** Classification success of canonical analysis of principal coordinates (CAP) based on the fatty acid profile of *Salicornia ramosissima* collected from four locations along the Portuguese coast: Ria de Aveiro (RAv), Mondego estuary (ME), Tagus estuary (TE), and Ria Formosa (RF).

|      | Predicted origin |    |    |    | Total               | %                          |
|------|------------------|----|----|----|---------------------|----------------------------|
|      | RAv              | ME | TE | RF | samples<br>per site | successfully<br>classified |
| RAv  | 27               | 2  | 1  | 0  | 30                  | 90.0                       |
| ME   | 3                | 26 | 1  | 0  | 30                  | 86.7                       |
| TE   | 1                | 0  | 29 | 0  | 30                  | 96.7                       |
| RF   | 0                | 0  | 0  | 27 | 27                  | 100.0                      |
| Mean |                  |    |    |    |                     | 93                         |

**Table S4.** Classification success of the cross-validation of the canonical analysis of principal coordinates (CAP) based on the fatty acid profile of *Salicornia ramosissima* collected from four locations along the Portuguese coast: Ria de Aveiro (RAv), Mondego estuary (ME), Tagus estuary (TE), and Ria Formosa (RF).

|     |     | Predicted site |    |    |    | Total    | % of      | % classified |    |    |     |
|-----|-----|----------------|----|----|----|----------|-----------|--------------|----|----|-----|
|     | RAv | ME             | TE | RF |    | number   | correctly | RAv          | ME | TE | RF  |
|     |     |                |    |    |    | of       | allocated |              |    |    |     |
|     |     |                |    |    |    | samples  | site      |              |    |    |     |
|     |     |                |    |    |    | per site |           |              |    |    |     |
| RAv | 15  |                |    |    | 15 | 100      |           | 100          |    |    |     |
| ME  | 6   | 9              |    |    | 15 | 60       |           | 40           | 60 |    |     |
| TE  | 4   |                | 11 |    | 15 | 73       |           | 27           |    | 73 |     |
| RF  |     |                |    | 11 | 11 | 100      |           |              |    |    | 100 |

**Table S5.** Raw data of relative abundance (%) of fatty acids (FAs) present in the shoots of *Salicornia ramosissima* and their respective variation for each FA present in the four locations sampled: Ria de Aveiro (RAv, n = 30); Mondego estuary (ME, n = 30); Tagus estuary (TE, n = 30); and Ria Formosa (RF, n = 27).
